# Supplementary material for: Newly evolved introns in human retrogenes provide novel insights into their evolutionary roles
Source: PubMed Central journal article supplement (PMC3565874; doi:10.1186/1471-2148-12-128), 2012-07-28
Supplement: 1471-2148-12-128-S11.pdf [file 1471-2148-12-128-S11.pdf]

## **Additional file 11**

**Nucleotide-level alignments of retrogene introns ('Sbjct', blue and red, splice sites) and parental genes ('Query', program NCBI-BLAST [S1]).**

Red downward arrows indicate the exon-exon borders of parental genes. In XXyac-R12DG2.2, the retrogene is also annotated to be embedded near the 3' end of an ncRNA gene candidate (LOC100190939, Additional file 12). In CSMD3, green mark the intragenic region of the retroposed sequence. The retrogene is an alternative translation start point (Additional file 12). In WBP2NL, the retrogene is located in its first intron, but could be transcribed at sometimes (Additional file 1 and 2). Besides, the intronic region at XXyac-R12DG2.2 and AC019016.1 could be spliced in two patterns.

## References

- S1. Johnson M, Zaretskaya I, Raytselis Y, Merezhuk Y, McGinnis S, Madden TL:  
**NCBI BLAST: a better web interface.** *Nucleic Acids Res* 2008, **36** (Web  
Server issue):W5-9.



```
Query      TATTTACCTCACAGAACCTGTGGATGAATACTGTATTCAGGCCCTTCCCGAATTTGATGG
           | | | | | | | | | | | | | | | | | | | | | | | | | | | | | | | | | | |
Sbjct      TATTTACCTCACAGAACCTGTGGTTGAATACTGCATTCAGGCCCTTCCCGAATTTGATGG

Query      GAAGAGGTTCCAGAATGTTGCCAAGGAAGGAGTGAAGTTTCGATGAAAGTGAGAAACTAA
           | | | | | | | | | | | | | | | | | | | | | | | | | | | | | | | | | | |
Sbjct      GAAGAGGTTCCAGAATGTTGCCAAGGAAGGAGTGAAGTTTGATGACAGTGAGAAACTAA

Query      GGAGAGTCGTGAAGCAGTTGAGAAAGAATTTGAGCCTCTGCTGAATTGGATGAAAGATAA
           | | | | | | | | | | | | | | | | | | | | | | | | | | | | | | | | | | |
Sbjct      GGAGAGTCATGAAGCAGTTGAGAAAGAATTTGAGCCTCTGCCAATTGGGTGAAAGATAA

Query      AGCCCTTAAGGACAAGATTGAAAAGGCTGTGGTGTCTCAGCGCCTGACAGAATCTCCGTG
           | | | | | | | | | | | | | | | | | | | | | | | | | | | | | | | | | | |
Sbjct      AGCCATTAAGGACAAGATTGAAAAGGCTATGGTATCTCAGTGCCTGACAGAATCTCTGTG

Query      TGCTTTGGTGGCCAGCCAGTACGGATGGTCTGGCAACATGGAGAGAATCATGAAAGCACA
           | | | | | | | | | | | | | | | | | | | | | | | | | | | | | | | | | | |
Sbjct      TGCTTTGGTGGCCAGCCAGTACGGGTGGTCTGGCAACATGGAGAGAATCATGAAAGCACA

Query      AGCGTACCAAACGGGCAAGGCATCTCTACAAATTACTATGCGAGTCAGAAGAAAACATT
           | | | | | | | | | | | | | | | | | | | | | | | | | | | | | | | | | | |
Sbjct      AGCGTACCAAACGGGCAAGGCATCTCTACAAATTACCATGCGAGTCGGAAGAAAACATT

Query      TGAATTAATCCCAGACACCCGCTGATCAGAGACATGCTTCGACGAATTAAGGAAGATGA
           | | | | | | | | | | | | | | | | | | | | | | | | | | | | | | | | | | |
Sbjct      TGAATTAATCCCAGACATCCGCTGATCAGAGACATGCTTCGACGAATTAAGGAAGATGA

Query      AGATGATAAAACAGTTTTGGATCTTGCTGTGGTTTTTGTGTTGAAACAGCAACGC-----
           | | | | | | | | | | | | | | | | | | | | | | | | | | | | | | | | | | |
Sbjct      AGATGATAAAACAGTTTTGGATCTTGCTGTGGTTTTGTTTGAAACAGCAATGCAGCAGTG

Query      -TTCGGTCAGGGTATCTTTTACCAGACACTAAAGCATATGGAGATAGAATAGAAAGAATG
           | | | | | | | | | | | | | | | | | | | | | | | | | | | | | | | | | | |
Sbjct      ATTTCGGTCAGGATGTCTTTTACCAGACACTAAAGCATATGGAGATAGAATAGAAAGAATG

Query      CTTCGCCTCAGTTTGAACATTGACCCTGATGCAAAGGTGGAAGAAGAGCCCGAAGAAGAA
           | | | | | | | | | | | | | | | | | | | | | | | | | | | | | | | | | | |
Sbjct      CCTTCGCCTCAGTTTGAACA--CATCCTGATGCAAAGGTGGAAGAA---CCCGACGAAGAA

Query      CCTGAAGAGACAGCAG
           | | | | | | | | | | | | | | | | | | | | | | | | | | | | | | | | | | |
Sbjct      CCTGAGGAGACAGCAG
```

**HSP90AA4P**

```
Query      TGGGAGTCCTCAGCAGGGGGATCATTACAGTGAGGACAGACACAGGTGAACCTATGGGT
           | | | | | | | | | | | | | | | | | | | | | | | | | | | | | | | | | | |
Sbjct      TGGGAGTCCTCATTAAGGGGATCATTACAGTGAGGACAGACACAGGTGAACCTATAGGT

Query      CGTGAACAAAAGTTATCCTACACCTGAAAGAAGACCAAACCTGAGTACTTGGAGGAACGA
           | | | | | | | | | | | | | | | | | | | | | | | | | | | | | | | | | | |
Sbjct      CATGAACAAAAGTTATCCTACCGCTAAAAGAAGACCAAACCTGAGTACTTGGAGGAACGA

Query      AGAATAAAGGAGATTGTGAAGAAACATTCTCAGTTTATTGGATATCCCATTACTCTTTTT
           | | | | | | | | | | | | | | | | | | | | | | | | | | | | | | | | | | |
Sbjct      AAAATAAATGAGATTGTGAAGAAACATTCT--GTTTATTGGATATCCCGTCACTCTTTTT
```



Query GAGACCAAGGACCAGGTAGCTAACTCAGCCTTTGTGGAACGTCTTCGGAAACATGGCTTA  
 Sbjct GAGACCAAGGACCAGGTAGCTAACTCAACCATTGTGCAACGTCTTTGGAAACATGGCTTG

Query GAAGTGATCTATATGATTGAGCCCATTGATGAGTACTGTGTCCAACAGCTGAAGGAATTT  
 Sbjct GAAGTGATCTATACGATCGAGCCCATTGATGAGTACTGTGTCCAGCAGCTGAAGGAATTT

Query GAGGGGAAGACTTTAGTGTCTAGTCACCAAAGAAGGCCTGGAACTTCCAGAGGATgaagaa  
 Sbjct GAGGGGAAGACTTTAGTGTCTAGTCACCAAAGAGGACTTGGAACTTCCAGAGGATGAAGAA

Query GAGAAAAAGAAGCAGGAAGAG-----AAAAAACAAAGTTTG  
 Sbjct GAGAAAAAGAAACAGGAAGAGGGAAAAACAAAAACGAAACAAAAAAAAAACCAAGTTTG

Query AGAACCTCTGCAAAATCATGAAAGACATATTGGAGAAAAAGTTGAAAAAGTGGTTGTGT  
 Sbjct AGAACCTCTGCAAAATC**GTGAAAGACATTTTGAG--AAGAGTTGAAAAGGTGGTTGTGT**

Query CAAACCGATTGGTGACATCTCCATGCTGTATTGTCACAAGCACATATGGCTGGACAGCAA  
 Sbjct **CAAACCAATTGGTGACGTCTCCATGTTGTATTGTCTCAAG**CACATATGGCTGGACAGCAA

### HSP90AA5P

Query GGAGTACGGAGAATTCATATAAGAGCTTGACCAATGACTGGGAAGATCACTTGGCAGTGAA  
 Sbjct GGAGTATGGAGAGTTCATCAGAGCTTGACCAATAACTGGGAAGATCACTTGGCAGTGAA

Query **G**CATTTTTTCAGTTGAAGGACAGTTGGAA-----TTCAGAGCCC  
 Sbjct GCACTTTTTTCAGTTGAAGGGCAGTTGGAAGAGTTGAAGGACAGTCGAAGAGT**TTAG**AAGAG

Query TTCTATTTGTCCCACGACGTGCTCCTTTTGATCTGTTTGAAAACAGAAAAGAAAAGAACA  
 Sbjct **CTCTTTTTGTTTTCAAGATGTGCTCCTTTTGACCTATTGAAAACAGAAAAGAAAAGAACA**

Query ACATCAAATTTGTATGTACGCAGAGTTTTTCATCATGGATAACTGTGAGGAGCTAATCCCTG  
 Sbjct **ACATTCAGTTGTATGTACACAGAGTTTTTCATCATGGGTA**ACTGTGAGGAGCTAATCCCTG

Query AATATCTG**A**ACTTCATTAGAGGGGTGGTAGACTCGGAGGATCTCCCTCTAAACATATCCC  
 Sbjct **AATACCTGAACTTCATTAGAGGGGTGATG**ACTCAGAGGATCTCCCTCTAAATATTTTTT

Query GTGAGATGTTGCAACAAAGCAAATTTTGAAAGTTATCAGGAAGAATTTGGTCAAAAAT  
 Sbjct **CTGAGATGTTGCAACAAAGCAAATTTTGAAAGTAT**TAGGAAGAATTTGGTCAAAAAT

Query GCTTAGAACTCTTTACTGAACTGGCGGAAGATAAAGAGAACTACAAGAAATTCATGAGC  
 Sbjct **ACTTAGAACTCTTTGCTGAACTGGCAGAGGATAAAAAGAACTACA**AAAAGTCCACGAGA

Query AGTTCTCTAAAACATAAAAG**C**TTGGAATACACGAAGACTCTCAAATCGGAAGAAGCTTT  
 Sbjct **AGTTATCTGAAAACATAAATCTTTGAATATAT--AGACTCTCAAATCAGA**AGAAGCTTT







Query ATCGCACAGACTGTCACTGCTGTTGCCGGGTTGACTTCCTATCCATTTGACACTGTTCCG  
|| |||||  
Sbjct AT-GCACAGACTGTCACTGCCGTTGCTGGGTTGACTTCCTATTTCATTTAACACCATTTC

**AC019016.1**

Query GCGATCAACATCACCAACGGCGAGGAAGTGGCAGTGAAGCTAGAATCTCAGAAGGCCAGG  
|| |||||  
Sbjct GCGATCAGCATCACCAACGGTGAAGAAGTGGTAGTGAAGCCAGAATCTCAG--GCCAGG

Query CATCCCCAGTTGCTGTACGAGAGCAAGCTCTATAAGATTCTTCAAGGTGGGGTTGGC  
|| |||||  
Sbjct CATCCCCAGTTGCTGTACAAGAGCAGGCTTTACAAGATGCTTCAAGGTTGGGTTGGC

Query CCCACATACGGTGGTATGGTCAGGAAAAAGACTACAATGTACTAGTCATGGATCTT-CT  
|| |||||  
Sbjct CCCACATACGGTGGTGTGGTCAGGAAGAAGACTATAATGTACTAGTCATGGATTTTTCT

Query GGGACCTAGCCTCGAAGACCTCTTCAATTTCTGTTCAAGAAGGTTACAAATGAAACTGT  
|| |||||  
Sbjct GGGACCTAGCCTCGAAGACC-----AATTTCTGTTCAAGAAGGTTACAAATGAAACTGT

Query ACTTATGTTAGCTGACCAGATGATCAGTAGAATTGAATATGTGCATACAAAGAATTTTAT  
|| |||||  
Sbjct ACTTATATTAGCTGACCAGATGATCAGTAGAATTGAACATGTGCATACAAAGAATTTTAT

Query ACACAGAGACATTAACCAGATAACTTCCTAATGGGTATTGGGCGTCACTGTAATAAGTT  
|| |||||  
Sbjct ACACAGAGCCATTAACCAGGTAACCTTCCTAATGGGTATTGGGCGTCACTGTAGTAAGTT

Query ATTCCTTATTGATTTTGGTTTGGCCAAAAGTACAGAGACAACAGGACAAGGCAACACAT  
|| |||||  
Sbjct ATTCCTTATTGATTTTGGTTTGGCCAAAACGTACGGAGACAACAGGACAAGGCAACACAT

Query ACCATACAGAGAAGATAAAAACCTCACTGGCACTGCCCGATATGCTAGCATCAATGCACA  
|| |||||  
Sbjct ACCATACAGAGAAGATAAAAACCTCACTGGCACTGCCCTGTATGCTAGCC---ATGCACA

Query TCTTGGTATTGAGCAGAGTCGCCGAGATGACATGGAATCATTAGGATATGTTTTGATGTA  
|| |||||  
Sbjct TCTTAGTATTGAGCAGAGTCGCCGGGATGACATGGAATCGTTAGAATATGTTTTGATGTA

Query TTTTAATAGAACCAGCC-----TGCCATGGCAAGGGCTAAAGGCTGCAACAAAGAAA  
|| |||||  
Sbjct TTTTAATAGAACCAGCCAACCAGCCTGCCATGGCAAGGGCTAAAGGCTGCAAGCAGAGAAA

Query CAAAAATATGAAAAGATTAGTAAAAGAAGATGTCCACGCCTGTTGAAGTTTATGTAAG  
|| |||||  
Sbjct CAAAAATATGAAAAGATTAGTAAAAGAAGATGTCTACTCCTGTT-----TTTTGTAAG

Query GGGTTTCCTGCAGAATTTGCGATGTACTTAAACTATTGTCGTGGGCTACGCTTTGAGGAA  
|| |||||  
Sbjct GGGTTTGTGCAGAATTTGCCATATACTTAAACCCTGTGTCGTGGGCTACACTTAGAGAAA

Query GCCCAGATTACATGTATCTGAGGCAGCTATTCCGCATTCTTTTCAGGACCCTGAACCAT  
|| |||||  
Sbjct GCCCAGATTACATGTATCTGACGCAGCTATTCTGCATTCTTTTCAGGACCCTGATCCAT
